# Supplementary material for: Synthesis of a Fe3O4–CuO@meso-SiO2 nanostructure as a magnetically recyclable and efficient catalyst for styrene epoxidation
Source: Royal Society of Chemistry journal article supplement (doi:10.1039/c4cy00430b), 2014-01-01
Supplement: c4cy00430b1.pdf [file c4cy00430b1.pdf]

## **Synthesis of Fe<sub>3</sub>O<sub>4</sub>-CuO@meso-SiO<sub>2</sub> Nanostructure as a Magnetically Recyclable and Efficient Catalyst for Styrene Epoxidation**

Xiaowei Zhang,<sup>a</sup> Ge Wang,<sup>\*a</sup> Mu Yang,<sup>a</sup> Yi Luan,<sup>a</sup> Wenjun Dong,<sup>\*b</sup> Rui Dang,<sup>a,b</sup>  
Hongyi Gao<sup>a</sup> and Jie Yu<sup>a</sup>

<sup>a</sup> School of Materials Science and Engineering, University of Science and Technology  
Beijing, Beijing 100083, China. Fax: +86-10-62327878; Tel: +86-10-62333765; E-mail:  
gewang@mater.ustb.edu.cn

<sup>b</sup> Center for Nanoscience and Nanotechnology, Department of Physics, Zhejiang Sci-tech  
University, Hangzhou 310018, China. Fax: +86-571-86843587; Tel: +86-571-86843587;  
E-mail: wenjundong@zstu.edu.cn

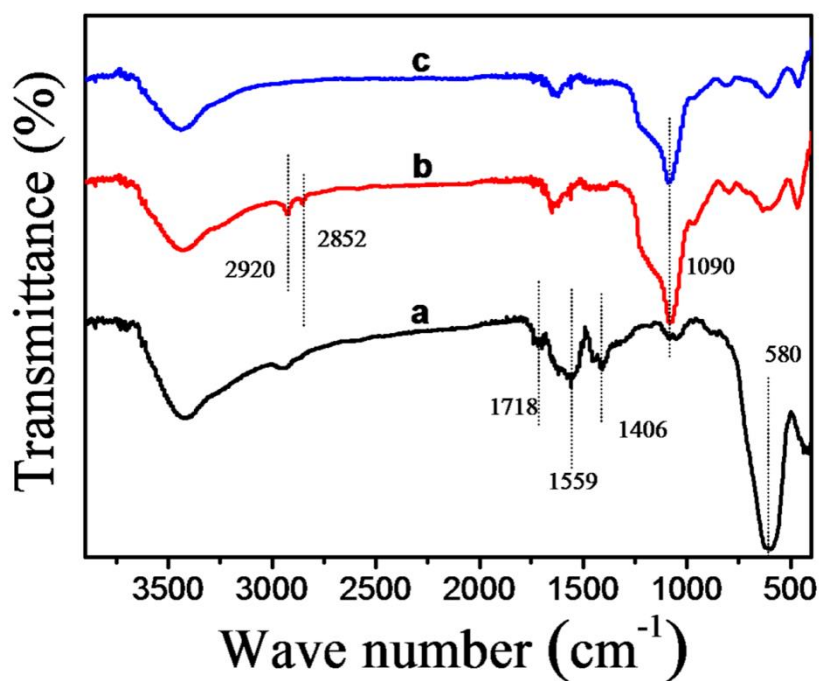

**Fig. S1** FT-IR spectra of (a)  $\text{Fe}_3\text{O}_4(\text{PAA})$ , (b)  $\text{Fe}_3\text{O}_4\text{-CuO@meso-SiO}_2(\text{CTAB})$  without the treatment of acetone and (c)  $\text{Fe}_3\text{O}_4\text{-CuO@meso-SiO}_2$  after the treatment of acetone.

The existence of PAA (curve a) was confirmed by the C-O bond at  $1406\text{ cm}^{-1}$ , C=C bond at  $1559\text{ cm}^{-1}$  and C=O bond at  $1718\text{ cm}^{-1}$  from carboxyl groups.<sup>1</sup> For  $\text{Fe}_3\text{O}_4\text{-CuO@meso-SiO}_2$  with CTAB (curve b), the bonds at around  $2852\text{ cm}^{-1}$  and  $2920\text{ cm}^{-1}$  correspond to the vibrations of  $-\text{CH}_2$  from CTAB. The disappearance of the two peaks at  $2852\text{ cm}^{-1}$  and  $2920\text{ cm}^{-1}$  (curve c) after the extraction treatment with acetone, indicate the complete removal of the CTAB template.<sup>2</sup>

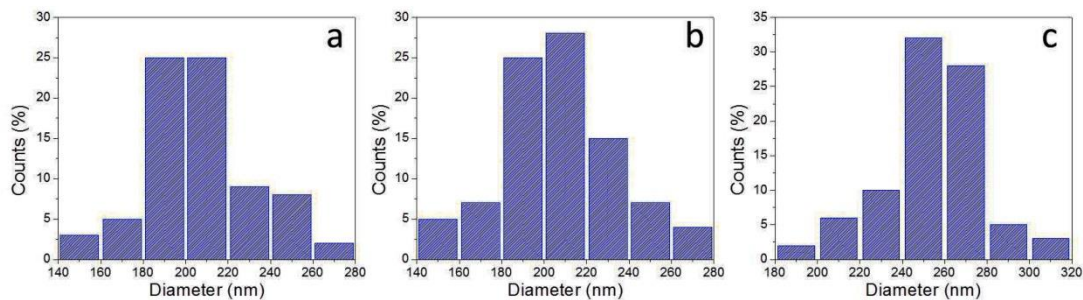

**Fig. S2** The particle size distributions of (a)  $\text{Fe}_3\text{O}_4$ , (b)  $\text{Fe}_3\text{O}_4\text{-CuO}$  and (c)  $\text{Fe}_3\text{O}_4\text{-CuO@meso-SiO}_2$ .

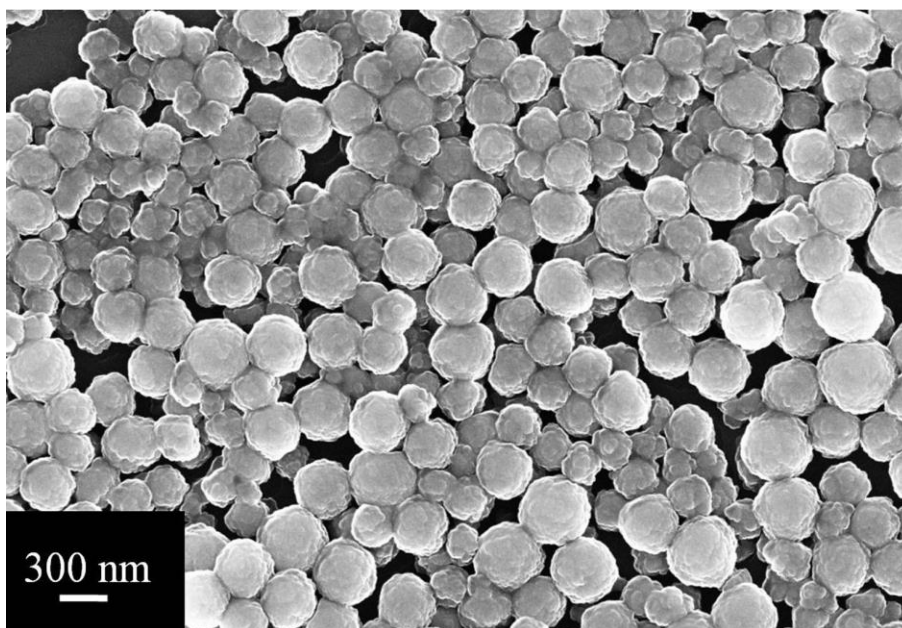

**Fig. S3** SEM photograph of the as-synthesized CuO nanoparticles.

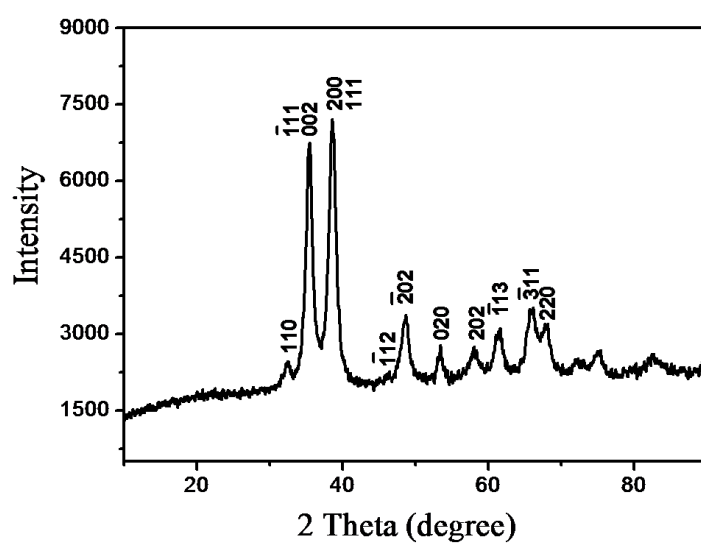

**Fig. S4** X-ray diffraction patterns of the as-synthesized CuO nanoparticles.

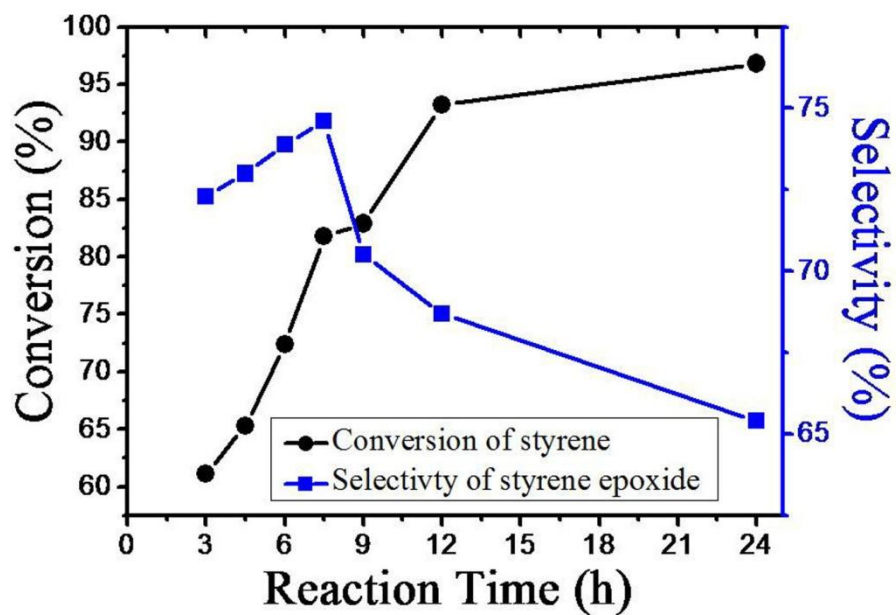

**Fig. S5.** Conversion of styrene and selectivity of styrene epoxide versus reaction time catalyzed by as-prepared CuO nanoparticles.

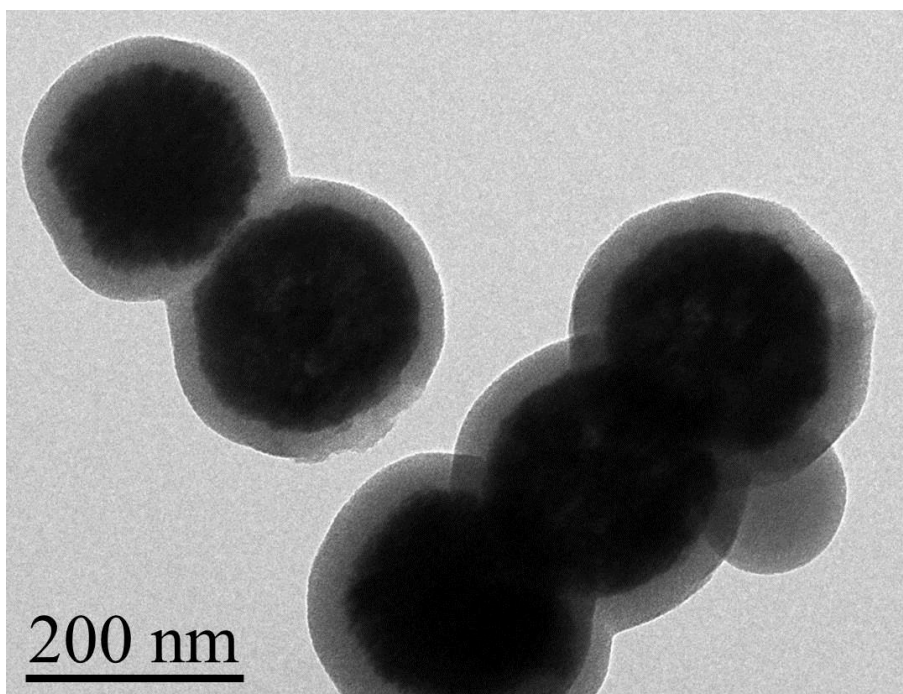

**Fig. S6** HRTEM photograph of the  $\text{Fe}_3\text{O}_4\text{-CuO@meso-SiO}_2$  catalyst after eight runs of styrene epoxidation.

## References:

1. X. L. Huang, J. Zhuang, D. Chen, H. Y. Liu, F. Q. Tang, X. Y. Yan, X. W. Meng, L. Zhang and J. Ren, *Langmuir*, 2009, **25**, 11657.
2. Y. H. Deng, D. W. Qi, C. H. Deng, X. M. Zhang and D. Y. Zhao, *J. Am. Chem. Soc.*, 2008, **130**, 28.
